# Supplementary material
Source: MDPI journal article supplement (https://www.mdpi.com/2076-0760/13/4/200)
Supplement: s1 [file s1]

Table S1. Factor loadings and Eigenvalues

|                                                                                                                                               | Task<br>perform<br>ance | Organi-<br>zational<br>commit<br>ment | Work-<br>life<br>conflict |
|-----------------------------------------------------------------------------------------------------------------------------------------------|-------------------------|---------------------------------------|---------------------------|
| <b>Task performance</b> ( <i>Cronbach's <math>\alpha = 0.84</math></i> )                                                                      |                         |                                       |                           |
| <i>In the past three months ... (1=Seldom, 5=Never)</i>                                                                                       |                         |                                       |                           |
| Without being told, I started on new tasks after finishing up my work                                                                         | <b>0.66</b>             | -0.06                                 | -0.05                     |
| I took on challenging new tasks when they were available                                                                                      | <b>0.83</b>             | -0.03                                 | -0.02                     |
| I worked on keeping my work skills up-to-date                                                                                                 | <b>0.56</b>             | 0.06                                  | 0.00                      |
| I took on extra responsibilities                                                                                                              | <b>0.73</b>             | 0.01                                  | 0.08                      |
| I actively participated in meetings and/or consultations                                                                                      | <b>0.52</b>             | 0.05                                  | -0.01                     |
| <b>Organizational commitment</b> ( <i>Cronbach's <math>\alpha = 0.85</math></i> )                                                             |                         |                                       |                           |
| <i>To what extent do you agree or disagree with the following statements about your organisation? (1=Strongly disagree, 5=strongly agree)</i> |                         |                                       |                           |
| I am willing to go above and beyond the call of duty to help my organisation be successful                                                    | 0.17                    | <b>0.54</b>                           | 0.08                      |
| I tell my friends that my organisation is a great place to work                                                                               | -0.07                   | <b>0.84</b>                           | -0.10                     |
| I am proud to tell others that I am part of this organisation                                                                                 | -0.06                   | <b>0.88</b>                           | -0.05                     |
| I really care about the future of this organisation                                                                                           | 0.02                    | <b>0.72</b>                           | 0.03                      |
| <b>Work-life conflict</b> ( <i>Cronbach's <math>\alpha = 0.86</math></i> )                                                                    |                         |                                       |                           |
| <i>How often does it happen that ... (1=Never, 5=Always)</i>                                                                                  |                         |                                       |                           |
| You do not have the energy to engage in leisure activities with your family or friends because of your job?                                   | -0.04                   | -0.01                                 | <b>0.80</b>               |
| You have to work so hard that you do not have time for any of your hobbies?                                                                   | 0.00                    | 0.01                                  | <b>0.81</b>               |
| Your work obligations make it difficult for you to feel relaxed at home?                                                                      | 0.01                    | -0.02                                 | <b>0.76</b>               |
| <b>Eigenvalue</b>                                                                                                                             | <b>2.64</b>             | <b>2.77</b>                           | <b>2.05</b>               |

Source: ESWS wave 1 (2016),  $n = 10,219$ ; Principal-factor analysis with oblique oblmin rotation
